# Supplementary material for: Optimization of peptide foldamer-based artificial retro-aldolase
Source: Royal Society of Chemistry journal article supplement (doi:10.1039/d4cy00342j), 2024-01-01
Supplement: d4cy00342j1.pdf [file d4cy00342j1.pdf]

Electronic Supplementary Information

Optimization of peptide foldamer-based artificial retro-aldolase

Katarzyna Ożga, Ewa Rudzińska-Szostak and Łukasz Berlicki\*

*Department of Bioorganic Chemistry, Faculty of Chemistry, Wrocław University of Science  
and Technology, Wybrzeże Wyspiańskiego 27, 50-370 Wrocław, Poland*

\*Corresponding author: e-mail: [lukasz.berlicki@pwr.edu.pl](mailto:lukasz.berlicki@pwr.edu.pl)

## Table of contents

|                                                                                                                                                                              |           |
|------------------------------------------------------------------------------------------------------------------------------------------------------------------------------|-----------|
| Table S1. MS and HPLC data of the synthesized peptides                                                                                                                       | S3        |
| Figure S1. The design steps leading to optimization of artificial aldolases.                                                                                                 | S4        |
| Figure S2. Retro-aldol reaction of methodol.                                                                                                                                 | S4        |
| Figure S3. <sup>1</sup> H spectrum (A), TOCSY spectrum (B), and ROESY spectrum (C) recorded for peptide 8 in d <sup>3</sup> -MeOH at 291 K.                                  | S5        |
| Figure S4. <sup>1</sup> H spectrum (A), TOCSY spectrum (B), and ROESY spectrum (C) recorded for peptide 9 in d <sup>3</sup> -MeOH at 291 K.                                  | S6        |
| Figure S5. <sup>1</sup> H spectrum (A), TOCSY spectrum (B), and ROESY spectrum (C) recorded for peptide 12 in d <sup>3</sup> -MeOH at 285 K.                                 | S7        |
| Figure S6. <sup>1</sup> H spectrum (A), TOCSY spectrum (B), and ROESY spectrum (C) recorded for peptide 13 in d <sup>3</sup> -MeOH at 293 K.                                 | S8        |
| Figure S7. <sup>1</sup> H spectrum (A), TOCSY spectrum (B), and ROESY spectrum (C) recorded for peptide 14 in 10 mM phosphate buffer pH 7.5 (10% D <sub>2</sub> O) at 293 K. | S9        |
| Table S2. NMR chemical shifts assignments for peptide 8.                                                                                                                     | S10       |
| Table S3. NOESY contacts for peptide 8.                                                                                                                                      | S11       |
| Table S4. NMR chemical shifts assignments for peptide 9.                                                                                                                     | S12       |
| Table S5. NOESY contacts for peptide 9.                                                                                                                                      | S13       |
| Table S6. NMR chemical shifts assignments for peptide 12.                                                                                                                    | S14       |
| Table S7. NOESY contacts for peptide 12.                                                                                                                                     | S15       |
| Table S8. NMR chemical shifts assignments for peptide 13.                                                                                                                    | S16       |
| Table S9. NOESY contacts for peptide 13.                                                                                                                                     | S17       |
| Table S10. NMR chemical shifts assignments for peptide 14.                                                                                                                   | S18       |
| Table S11. NOESY contacts for peptide 14.                                                                                                                                    | S19       |
| Figure S8. Structural formulas for peptides 8 (A), 9 (B), 12 (C), 13 (D) and 14 (E).                                                                                         | S20       |
| Table S12. NMR calculation statistics for the biggest clusters.                                                                                                              | S21       |
| Figure S9. Average structure of cluster 1 (left) and superimposition of the 5 lowest energy structures of cluster 1 (right).                                                 | S21       |
| Figure S10. Average structure of cluster 2 (left) and superimposition of the 5 lowest energy structures of cluster 2 (right).                                                | S21       |
| Figure S11. Average structure of cluster 3 (left) and superimposition of the 5 lowest energy structures of cluster 3 (right).                                                | S22       |
| Table S13. Distances between active site residues calculated for 3 clusters                                                                                                  | S22       |
| Figure S12. Analytical HPLC chromatograms for analyzed peptides.                                                                                                             | S23 – S25 |

**Table S1.** MS and HPLC data of the synthesized peptides

| Peptide | Sequence                                                                                                            | MS Calculate d m/z                                                                 | MS Experimental m/z                                                                | Analytical HPLC t <sub>r</sub> [min] (gradient*) |
|---------|---------------------------------------------------------------------------------------------------------------------|------------------------------------------------------------------------------------|------------------------------------------------------------------------------------|--------------------------------------------------|
| 1       | Ac-a <sup>+</sup> kk <sup>+</sup> ks-NH <sub>2</sub>                                                                | 1046.6726 [M + H <sup>+</sup> ]                                                    | 1046.6719 [M + H <sup>+</sup> ]                                                    | 8.79 (I)                                         |
| 2       | Ac-Ss <sup>+</sup> Ss <sup>+</sup> -GGG-a <sup>+</sup> Ss <sup>+</sup> Ss <sup>+</sup> -NH <sub>2</sub>             | 943.9789 [M + 2 H <sup>+</sup> ];<br>962.8732 [M + K <sup>+</sup> H <sup>+</sup> ] | 943.9803 [M + 2 H <sup>+</sup> ];<br>962.8924 [M + K <sup>+</sup> H <sup>+</sup> ] | 7.75 (II)                                        |
| 3       | Ac-Sk <sup>+</sup> kk <sup>+</sup> -GGG-a <sup>+</sup> kk <sup>+</sup> ks-NH <sub>2</sub>                           | 712.1154 [M + 3 H <sup>+</sup> ]                                                   | 712.1160 [M + 3 H <sup>+</sup> ]                                                   | 8.88 (I)                                         |
| 4       | Ac-Sf <sup>+</sup> Ff <sup>+</sup> -GGG-a <sup>+</sup> kk <sup>+</sup> ks-NH <sub>2</sub>                           | 731.0889 [M + 3 H <sup>+</sup> ]                                                   | 731.0884 [M + 3 H <sup>+</sup> ]                                                   | 8.87 (II)                                        |
| 5       | Ac-Sy <sup>+</sup> Yy <sup>+</sup> -GGG-a <sup>+</sup> kk <sup>+</sup> ks-NH <sub>2</sub>                           | 1120.1217 [M + 2 H <sup>+</sup> ]                                                  | 1120.1213 [M + 2 H <sup>+</sup> ]                                                  | 7.89 (II)                                        |
| 6       | Ac-Qa <sup>+</sup> Ek <sup>+</sup> -GGG-a <sup>+</sup> Ak <sup>+</sup> As-NH <sub>2</sub>                           | 1003.0695 [M + 2 H <sup>+</sup> ]                                                  | 1003.0692 [M + 2 H <sup>+</sup> ]                                                  | 7.10 (II)                                        |
| 7       | Ac-Qa <sup>+</sup> Yk <sup>+</sup> -GGG-a <sup>+</sup> Ak <sup>+</sup> As-NH <sub>2</sub>                           | 1020.0799 [M + 2 H <sup>+</sup> ]                                                  | 1020.0555 [M + 2 H <sup>+</sup> ]                                                  | 7.71 (II)                                        |
| 8       | Ac-Ka <sup>+</sup> Yk <sup>+</sup> -GGG-a <sup>+</sup> Ak <sup>+</sup> Ae-NH <sub>2</sub>                           | 694.0705 [M + 3 H <sup>+</sup> ]                                                   | 694.0716 [M + 3 H <sup>+</sup> ]                                                   | 7.94 (II)                                        |
| 9       | Ac-Ka <sup>+</sup> Yk <sup>+</sup> -GGG-a <sup>+</sup> Ak <sup>+</sup> Fe-NH <sub>2</sub>                           | 1079.1190 [M + 2H <sup>+</sup> ]                                                   | 1079.1185 [M + 2H <sup>+</sup> ]                                                   | 7.55 (II)                                        |
| 10      | Ac-Ka <sup>+</sup> Yk <sup>+</sup> -GGG-a <sup>+</sup> Ay <sup>+</sup> Ae-NH <sub>2</sub>                           | 1058.5875 [M + 2 H <sup>+</sup> ]                                                  | 1058.5881 [M + 2 H <sup>+</sup> ]                                                  | 8.02 (II)                                        |
| 11      | Ac-Ka <sup>+</sup> Yk <sup>+</sup> -GGGG-a <sup>+</sup> Ak <sup>+</sup> Fe-NH <sub>2</sub>                          | 1107.6298 [M + 2 H <sup>+</sup> ]                                                  | 1107.6996 [M + 2 H <sup>+</sup> ]                                                  | 7.85 (II)                                        |
| 12      | Ac-Ka <sup>+</sup> Yk <sup>+</sup> - <sup>+</sup> - <sup>+</sup> kA <sup>+</sup> aE-NH <sub>2</sub>                 | 1031.1211 [M + 2 H <sup>+</sup> ]                                                  | 1031.1221 [M + 2 H <sup>+</sup> ]                                                  | 7.88 (II)                                        |
| 13      | Ac-k <sup>+</sup> Ak <sup>+</sup> Sa <sup>+</sup> - <sup>+</sup> -aS <sup>+</sup> kY <sup>+</sup> e-NH <sub>2</sub> | 782.6501 [M + 3 H <sup>+</sup> ]                                                   | 782.6651 [M + 3 H <sup>+</sup> ]                                                   | 7.94 (II)                                        |
| 14      | Ac-a <sup>+</sup> Ya <sup>+</sup> Sa <sup>+</sup> - <sup>+</sup> - <sup>+</sup> Ky <sup>+</sup> Sa-NH <sub>2</sub>  | 695.3940 [M + 3 H <sup>+</sup> ]                                                   | 695.3954 [M + 3 H <sup>+</sup> ]                                                   | 16.41 (III)                                      |
| 15*     | Ac- <sup>+</sup> sQ <sup>+</sup> yY <sup>+</sup> - <sup>+</sup> -sE <sup>+</sup> kA <sup>+</sup> -NH <sub>2</sub>   | 1008.5462 [M + 2 H <sup>+</sup> ]                                                  | 1008.5677 [M + 2 H <sup>+</sup> ]                                                  | 14.56 (III)                                      |
| 16*     | Ac- <sup>+</sup> eQ <sup>+</sup> kN <sup>+</sup> - <sup>+</sup> -sY <sup>+</sup> yK <sup>+</sup> -NH <sub>2</sub>   | 1050.5806 [M + 2 H <sup>+</sup> ]                                                  | 1050.6244 [M + 2 H <sup>+</sup> ]                                                  | 9.00 (III)                                       |
| 17      | Ac-a <sup>+</sup> Ya <sup>+</sup> Sa <sup>+</sup> - <sup>+</sup> - <sup>+</sup> Ay <sup>+</sup> Sa-NH <sub>2</sub>  | 1014.0581 [M + 2 H <sup>+</sup> ]                                                  | 1014.0566 [M + 2 H <sup>+</sup> ]                                                  | 17.46 (III)                                      |
| 18      | Ac-a <sup>+</sup> Aa <sup>+</sup> Sa <sup>+</sup> - <sup>+</sup> - <sup>+</sup> Ky <sup>+</sup> Sa-NH <sub>2</sub>  | 996.5739 [M + 2 H <sup>+</sup> ]                                                   | 996.5738 [M + 2 H <sup>+</sup> ]                                                   | 15.31 (III)                                      |
| 19      | Ac-a <sup>+</sup> Ya <sup>+</sup> Sa <sup>+</sup> - <sup>+</sup> - <sup>+</sup> Ka <sup>+</sup> Sa-NH <sub>2</sub>  | 996.5739 [M + 2 H <sup>+</sup> ]                                                   | 996.5757 [M + 2 H <sup>+</sup> ]                                                   | 15.39 (III)                                      |

\*Previously published in [1]

(I) H<sub>2</sub>O/ACN: 0-3 min – 0% ACN, 3-13 min 90% ACN

(II) H<sub>2</sub>O/ACN: 0-2 min – 10% ACN, 2-11 min 90% ACN

(III) H<sub>2</sub>O/ACN: 0-2 min – 10% ACN, 2-32 min 90% ACN

| DESIGN ROUND | SCAFFOLD | MODELS                                                                             | HIGHEST $k_{\text{cat}} \cdot 10^6 \text{ [s}^{-1}\text{]}$ | COMMENT                                                 |
|--------------|----------|------------------------------------------------------------------------------------|-------------------------------------------------------------|---------------------------------------------------------|
| 1            | Helix    | 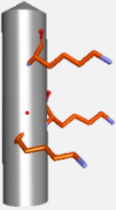  | $6.3 \pm 1.4$                                               | Single helix with lysine residues organized on one side |
| 2            | HLH      |   | $11.6 \pm 1.4$                                              | Helix-loop-helix with minimal active site               |
| 3            | HLH      |   | $22.8 \pm 1.2$                                              | Helix-loop-helix with native active site                |
| 4            | HTH      |  | $25.0 \pm 3.0$                                              | Helix-turn-helix with native active site                |

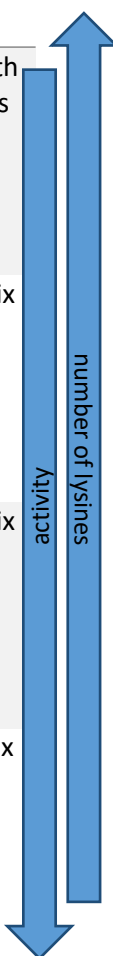

**Figure S1.** The design steps leading to optimization of artificial aldolases. In the presented models, the helical structures are represented as grey tubes and the linkers as green wires. The catalytic residues are shown in stick representation.

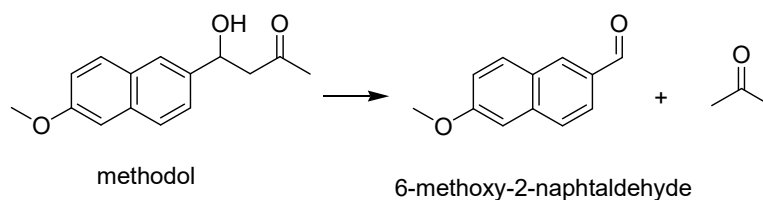

**Figure S2.** Retro-aldol reaction of methodol.

A

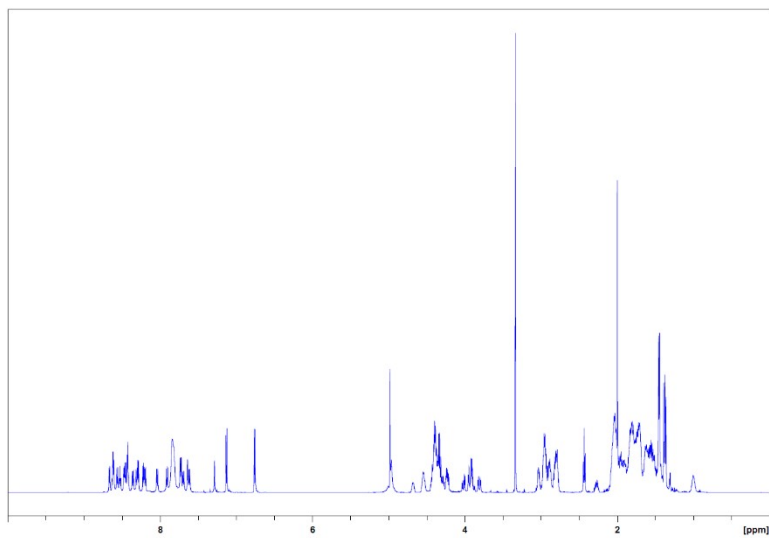

B

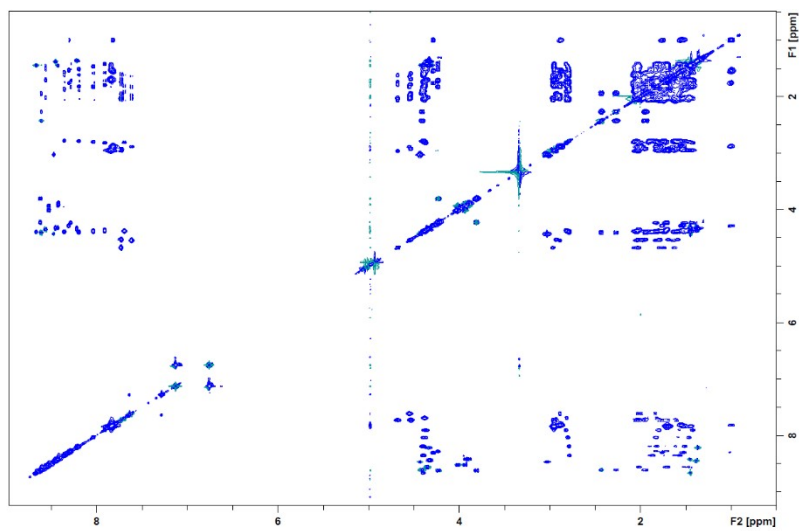

C

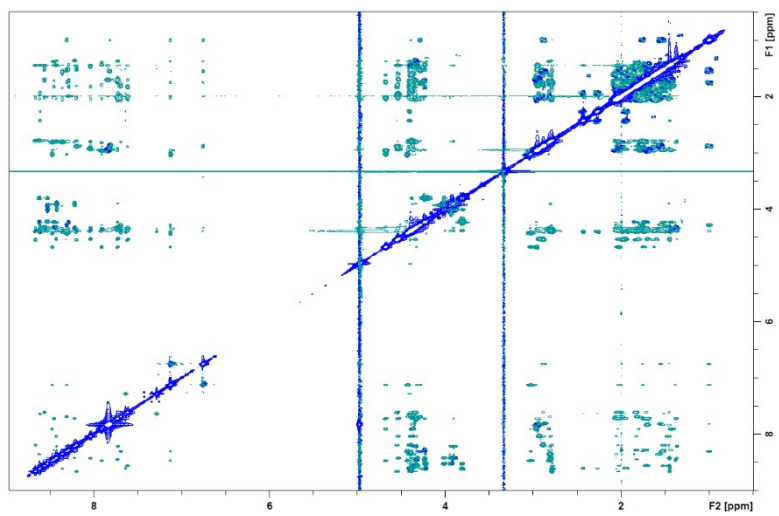

**Figure S3.**  
<sup>1</sup>H spectrum

(A), TOCSY spectrum (B), and ROESY spectrum (C) recorded for peptide **8** in  $d^3$ -MeOH at 291 K.

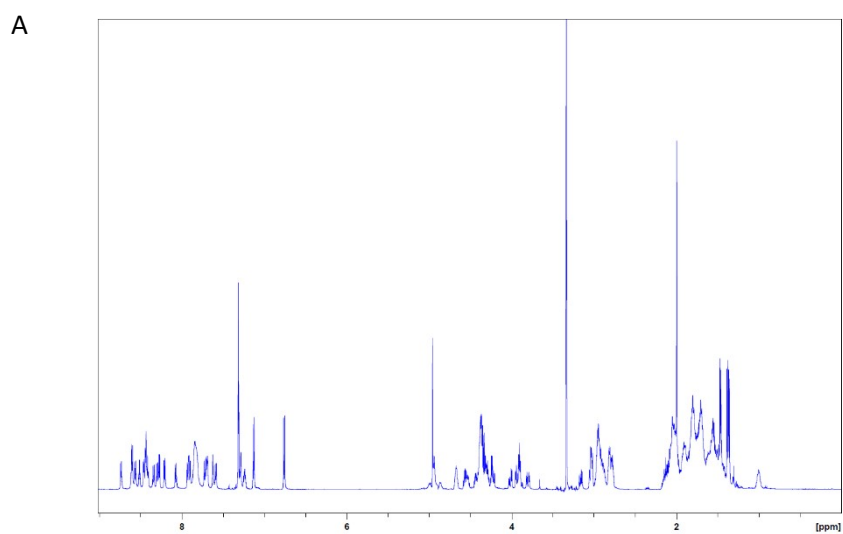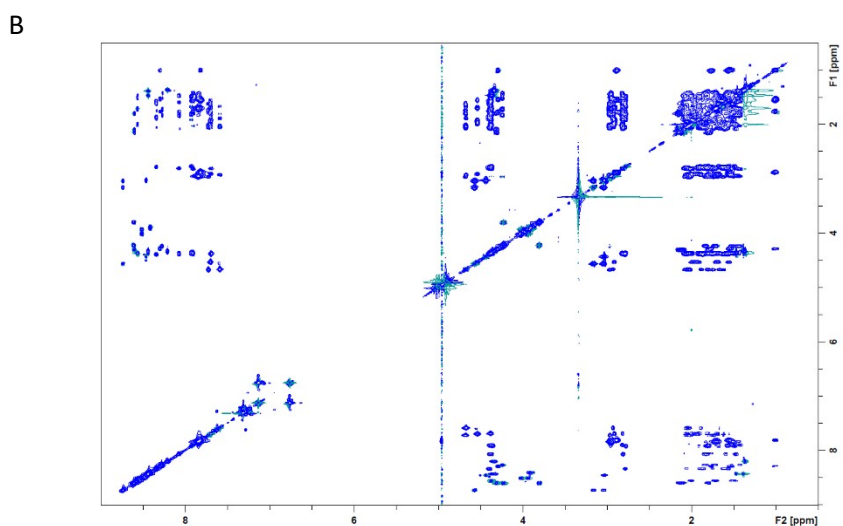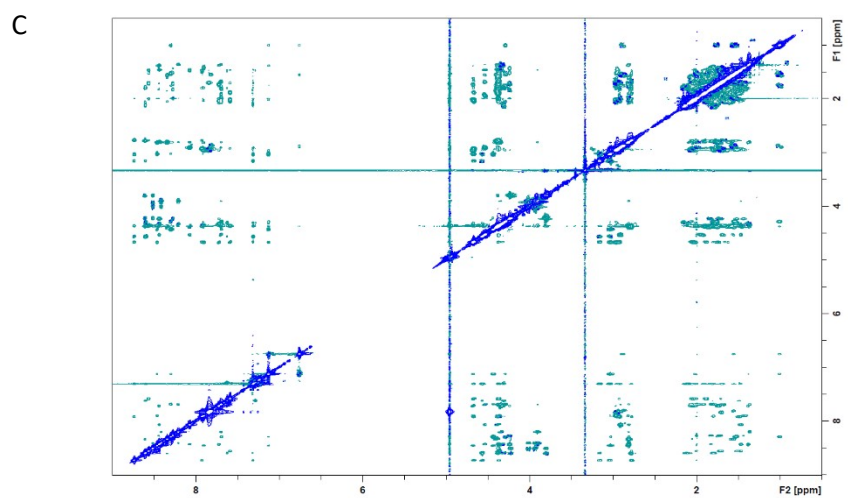

**Figure S4.**  $^1\text{H}$  spectrum (A), TOCSY spectrum (B), and ROESY spectrum (C) recorded for peptide **9** in  $\text{d}^3\text{-MeOH}$  at 291 K.

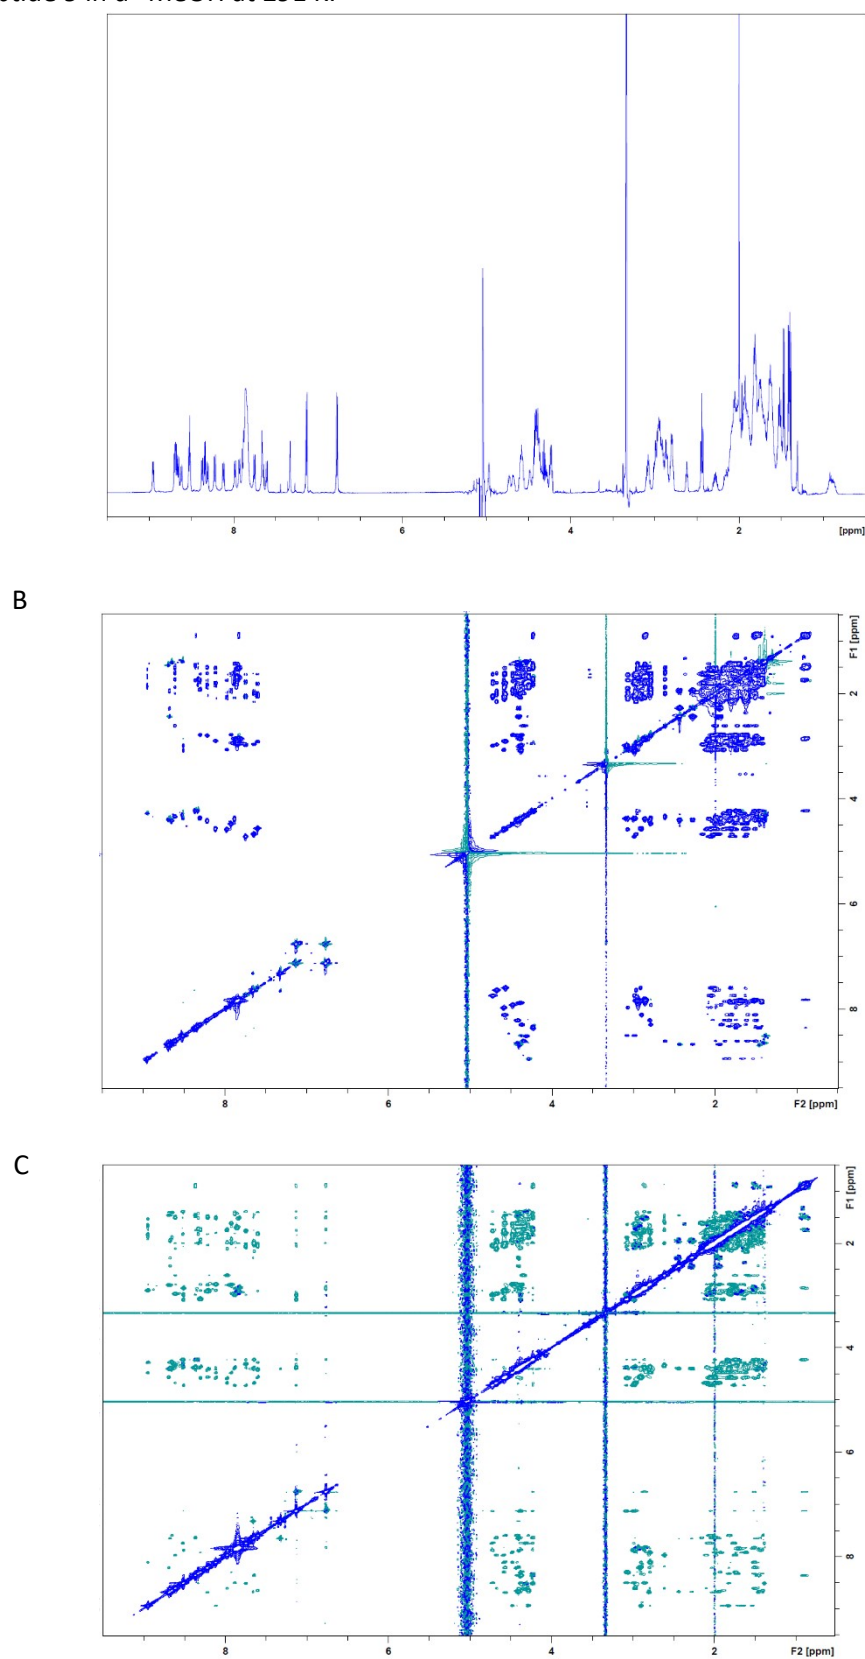

**Figure S5.**  $^1\text{H}$  spectrum (A), TOCSY spectrum (B), and ROESY spectrum (C) recorded for peptide **12** in  $\text{d}^3\text{-MeOH}$  at 285 K.

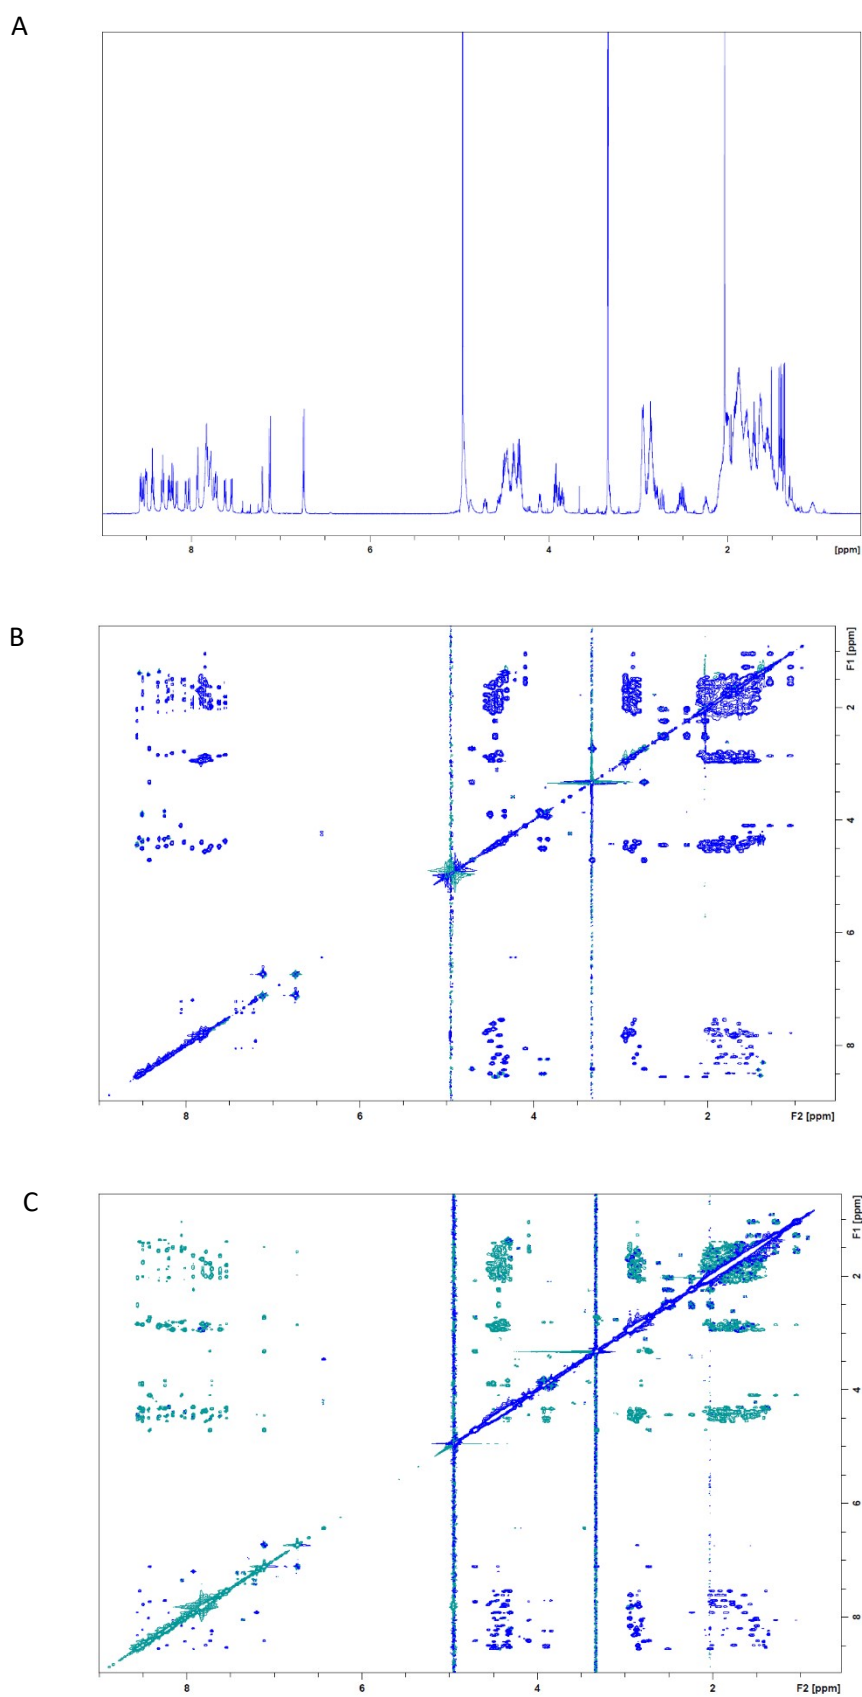

**Figure S6.**  $^1\text{H}$  spectrum (A), TOCSY spectrum (B), and ROESY spectrum (C) recorded for peptide **13** in  $\text{d}^3\text{-MeOH}$  at 293 K.



A

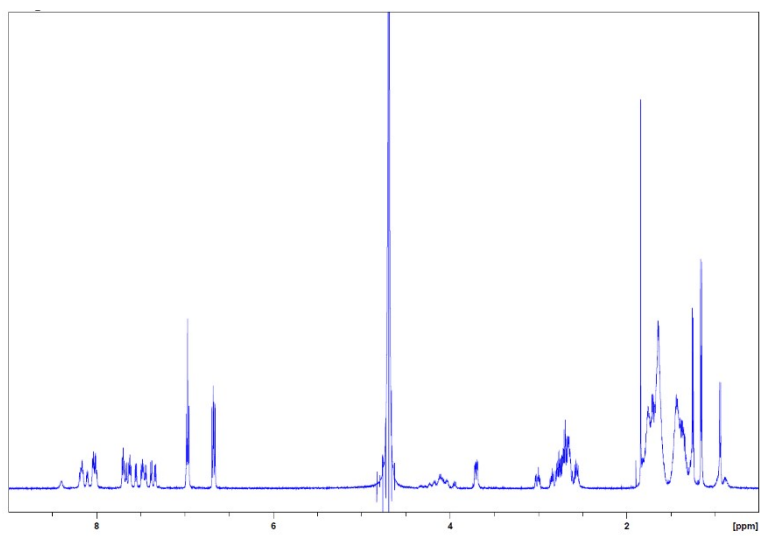

B

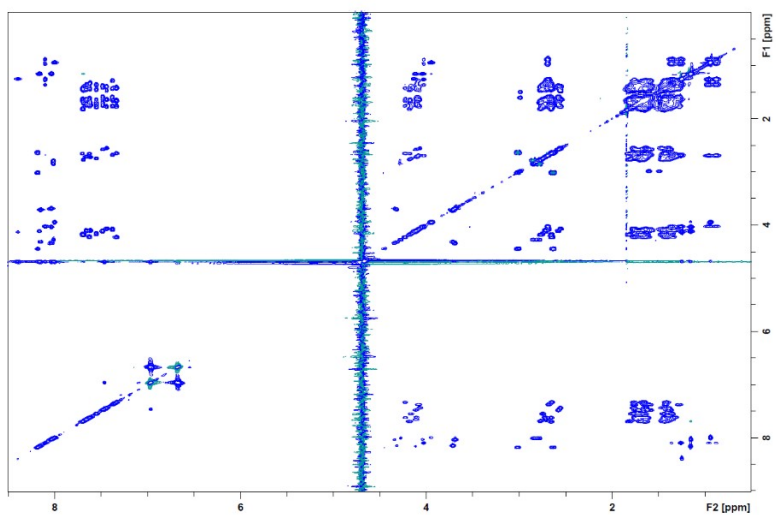

C

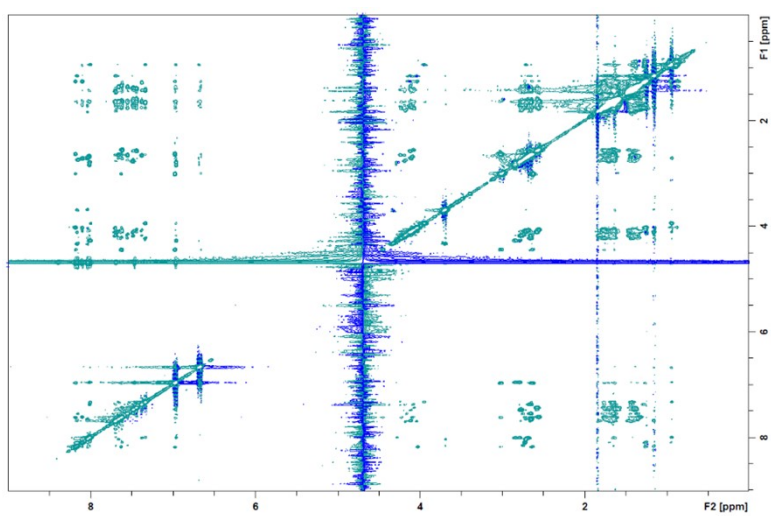

**Figure S7.**  $^1\text{H}$  spectrum (A), TOCSY spectrum (B), and ROESY spectrum (C) recorded for peptide **14** in 10 mM phosphate buffer pH 7.5 (10%  $\text{D}_2\text{O}$ ) at 293 K.

**Table S2.** NMR chemical shifts assignments for peptide **8**.

| Residue         | Proton          | Chemical shift [ppm]                           |
|-----------------|-----------------|------------------------------------------------|
| Ac0             | HA              | 2.00                                           |
| Lys1            | HN              | 8.29                                           |
|                 | HA              | 4.24                                           |
|                 | CH <sub>2</sub> | 1.43;<br>1.52;<br>1.72; 1.83                   |
| ala2            | HN              | 8.46                                           |
|                 | HA              | 4.32                                           |
|                 | HB              | 1.38                                           |
| CpS3            | HN              | 7.73                                           |
|                 | HA              | 2.97                                           |
|                 | HB              | 4.68                                           |
| CpR4            | HN              | 7.91                                           |
|                 | HA              | 2.82                                           |
|                 | HB              | 4.38                                           |
| CpR4            | CH <sub>2</sub> | 1.43;<br>1.58;<br>1.72;<br>1.80; 2.04          |
|                 | HN              | 8.47                                           |
|                 | HA              | 4.43                                           |
| Tyr5            | HB              | 3.03                                           |
|                 | HD              | 7.13                                           |
|                 | HE              | 6.76                                           |
| OH              |                 |                                                |
|                 | HN              | 8.31                                           |
|                 | HA              | 4.29                                           |
| lys6            | CH <sub>2</sub> | 1.00;<br>1.55;<br>1.53; 1.76                   |
|                 | HN              | 7.69                                           |
|                 | HA              | 2.81                                           |
| CpS7            | HB              | 4.38                                           |
|                 | CH <sub>2</sub> | 1.62;<br>1.82;<br>1.91;<br>2.00; 2.07          |
|                 | HN              | 8.36                                           |
| CpR8            | HA              | 2.79                                           |
|                 | HB              | 4.40                                           |
|                 | CH <sub>2</sub> | 1.57;<br>1.62;<br>1.75;<br>1.86;<br>1.90; 2.06 |
| Gly9            | HN              | 8.62                                           |
|                 | HA              | 4.23; 3.81                                     |
| Gly10           | HN              | 8.53                                           |
|                 | HA              | 4.02; 3.94                                     |
| Gly11           | HN              | 8.42                                           |
|                 | HA              | 3.91                                           |
| ala12           | HN              | 8.22                                           |
|                 | HA              | 4.34                                           |
| HB              |                 | 1.36                                           |
|                 | HN              | 7.73                                           |
| CpS13           | HA              | 2.93                                           |
|                 | HB              | 4.54                                           |
|                 | CH <sub>2</sub> | 1.61;<br>1.70;<br>1.95; 2.03                   |
| CpR14           | HN              | 8.04                                           |
|                 | HA              | 2.80                                           |
|                 | HB              | 4.39                                           |
| CpR14           | CH <sub>2</sub> | 1.47;<br>1.59;<br>1.76;<br>1.83; 2.07          |
|                 | HN              | 8.43                                           |
|                 | HA              | 4.32                                           |
| Ala15           | HB              | 1.45                                           |
|                 | HN              | 8.56                                           |
| lys16           | HA              | 4.36                                           |
|                 | CH <sub>2</sub> | 1.48;<br>1.52;<br>1.71; 2.02                   |
|                 | HN              | 7.62                                           |
| CpS17           | HA              | 2.89                                           |
|                 | HB              | 4.55                                           |
|                 | CH <sub>2</sub> | 1.64;<br>1.79;<br>1.83;<br>1.99; 2.03          |
| CpR18           | HN              | 8.20                                           |
|                 | HA              | 2.79                                           |
|                 | HB              | 4.40                                           |
| CpR18           | CH <sub>2</sub> | 1.51;<br>1.61;<br>1.73;<br>1.82;<br>1.90; 2.05 |
|                 | HN              | 8.67                                           |
|                 | HA              | 4.40                                           |
| Ala19           | HB              | 1.45                                           |
|                 | HN              | 8.61                                           |
| glu20           | HA              | 4.41                                           |
|                 | HB              |                                                |
|                 | HG              | 2.43                                           |
| NH <sub>2</sub> | HN1             | 7.64                                           |
|                 | HN2             | 7.29                                           |

**Table S3.** NOESY contacts for peptide **8**.

| Sequential ( <i>i</i> , <i>i</i> -1) | Intensity |
|--------------------------------------|-----------|
| HN1 – HA0                            | S         |
| HN2 – HA1                            | S         |
| HN3 – HA2                            | M         |
| HN4 – HA3                            | S         |
| HN5 – HA4                            | S         |
| HN6 – HA5                            | S         |
| HN7 – HA6                            | M         |
| HN8 – HA7                            | S         |
| HN9 – HA8                            | S         |
| HN10 – HA9                           | M         |
| HN11 – HA10                          | M         |
| HN12 – HA11                          | S         |
| HN13 – HA12                          | M         |
| HN14 – HA13                          | S         |
| HN15 – HA14                          | S         |
| HN16 – HA15                          | S         |
| HN17 – HA16                          | M         |
| HN18 – HA17                          | S         |
| HN19 – HA18                          | S         |
| HN20 – HA19                          | S         |
| HN <sub>2</sub> – HA20               | M         |

| NH-HN         | Intensity |
|---------------|-----------|
| HN1 – HN2     | M         |
| HN2 – HN3     | M         |
| HN4 – HN5     | M         |
| HN6 – HN7     | M         |
| HN7 – HN8     | W         |
| HN8 – HN9     | M         |
| HN10 – HN11   | M         |
| HN11 – HN12   | M         |
| HN12 – HN13   | M         |
| HN13 – HN14   | W         |
| HN14 – HN15   | M         |
| HN16 – HN17   | M         |
| HN17 – HN18   | W         |
| HN18 – HN19   | M         |
| HN20 – HN2(1) | M         |

| Medium range ( <i>i</i> , <i>i</i> -2) | Intensity |
|----------------------------------------|-----------|
| HN13 – HA11                            | W         |
| NH12 – HA10                            | W         |
| HN11 – HA9                             | W         |
| HN16 – HA14                            | W         |
| HN19 – HB17                            | M         |
| HN15 – HB13                            | M         |
| HN5 – HB3                              | M         |
| HN14 – HA12                            | W         |
| HN3 – HA1                              | W         |
| HN7 – HA5                              | W         |

|                         |   |
|-------------------------|---|
| HN17 – HA15             | W |
| HB8 – CH <sub>2</sub> 6 | W |
| HA4 – HB2               | W |
| HN14 – HB12             | W |
| Ar(1)5 – HA3            | W |

| Medium range ( <i>i</i> , <i>i</i> +2) | Intensity |
|----------------------------------------|-----------|
| HN4 – HA6                              | W         |
| HB17 – HB19                            | M         |
| HB3 – HB5                              | W         |
| HB13 – HB15                            | M         |
| HA7 – HA9                              | M         |

| Medium range ( <i>i</i> , <i>i</i> -3) | Intensity |
|----------------------------------------|-----------|
| HA6 – HA3                              | W         |
| HA10 – HA7                             | W         |
| Ar(1)5 – HB2                           | W         |
| Ar(2)5 – HB2                           | w         |

| Medium range ( <i>i</i> , <i>i</i> +3) | Intensity |
|----------------------------------------|-----------|
| HB17 – HE20                            | W         |
| HA11 – HA14                            | W         |
| HB13 – HA16                            | W         |

| Medium range ( <i>i</i> , <i>i</i> -4) | Intensity |
|----------------------------------------|-----------|
| HD20 – HA16                            | W         |

| Medium range ( <i>i</i> , <i>i</i> +4) | Intensity |
|----------------------------------------|-----------|
| HN1 – HA5                              | W         |

| NH   | 3J [Hz] |
|------|---------|
| HN1  | 6.37    |
| HN2  | 7.27    |
| HN3  | 8.29    |
| HN4  | 9.37    |
| HN5  | 5.23    |
| HN6  | 8.59    |
| HN7  | 8.41    |
| HN8  | 9.13    |
| HN10 | 5.56    |
| HN12 | 6.91    |
| HN13 | 8.29    |
| HN14 | 9.13    |
| HN15 | 5.28*   |
| HN16 | 8.23    |
| HN17 | 8.47    |
| HN18 | 9.43    |
| HN19 | 6.31    |
| HN20 | 8.05    |

**Table S4.** NMR chemical shifts assignments for peptide **9**.

| Residue         | Proton          | Chemical shift [ppm]               |
|-----------------|-----------------|------------------------------------|
| Ac0             | HA              | 2.00                               |
| Lys1            | HN              | 8.27                               |
|                 | HA              | 4.24                               |
|                 | CH <sub>2</sub> | 1.43, 1.52, 1.73, 1.83             |
| ala2            | HN              | 8.43                               |
|                 | HA              | 4.34                               |
|                 | HB              | 1.38                               |
| CpS3            | HN              | 7.72                               |
|                 | HA              | 2.97                               |
|                 | HB              | 4.68                               |
|                 | CH <sub>2</sub> | 1.62, 1.74, 2.03                   |
| CpR4            | HN              | 7.91                               |
|                 | HA              | 2.82                               |
|                 | HB              | 4.38                               |
|                 | CH <sub>2</sub> | 1.43, 1.58, 1.73, 1.80, 2.03       |
| Tyr5            | HN              | 8.46                               |
|                 | HA              | 4.44                               |
|                 | HB              | 3.03                               |
|                 | HD              | 7.13                               |
|                 | HE              | 6.67                               |
| lys6            | OH              |                                    |
|                 | HN              | 8.30                               |
|                 | HA              | 4.29                               |
| CpS7            | CH <sub>2</sub> | 1.00, 1.53, 1.77                   |
|                 | HN              | 7.69                               |
|                 | HA              | 2.81                               |
|                 | HB              | 4.38                               |
| CpR8            | CH <sub>2</sub> | 1.61, 1.69, 1.82, 1.92, 2.07       |
|                 | HN              | 8.34                               |
|                 | HA              | 2.79                               |
|                 | HB              | 4.40                               |
| Gly9            | CH <sub>2</sub> | 1.57, 1.62, 1.75, 1.87, 1.90, 2.06 |
|                 | HN              | 8.61                               |
|                 | HA              | 3.80, 4.23                         |
| Gly10           | HN              | 8.51                               |
|                 | HA              | 3.94, 4.02                         |
| Gly11           | HN              | 8.41                               |
|                 | HA              | 3.89, 3.92                         |
| ala12           | HN              | 8.21                               |
|                 | HA              | 4.34                               |
|                 | HB              | 1.36                               |
| CpS13           | HN              | 7.70                               |
|                 | HA              | 2.91                               |
|                 | HB              | 4.54                               |
|                 | CH <sub>2</sub> | 1.55, 1.69, 1.93, 1.98             |
| CpR14           | HN              | 8.07                               |
|                 | HA              | 2.81                               |
|                 | HB              | 4.38                               |
|                 | CH <sub>2</sub> | 1.48, 1.59, 1.77, 1.82, 2.09       |
| Ala15           | HN              | 8.44                               |
|                 | HA              | 4.37                               |
|                 | HB              | 1.47                               |
| lys16           | HN              | 8.56                               |
|                 | HA              | 4.37                               |
|                 | CH <sub>2</sub> | 1.50, 1.71, 2.00                   |
| CpS17           | HN              | 7.59                               |
|                 | HA              | 2.93                               |
|                 | HB              | 4.67                               |
|                 | CH <sub>2</sub> | 1.67, 1.81, 1.89, 2.05             |
| CpR18           | HN              | 7.93                               |
|                 | HA              | 2.78                               |
|                 | HB              | 4.37                               |
|                 | CH <sub>2</sub> | 1.49, 1.57, 1.68, 1.81, 1.92       |
| Phe19           | HN              | 8.74                               |
|                 | HA              | 8.73                               |
|                 | HB              | 3.04, 3.16                         |
|                 | Har             | 7.22 - 7.33                        |
| glu20           | HN              | 8.60                               |
|                 | HA              | 4.31                               |
|                 | CH <sub>2</sub> | 1.80, 2.12                         |
| NH <sub>2</sub> | HN1             | 7.28                               |
|                 | HN2             | 7.62                               |

**Table S5.** NOESY contacts for peptide **9**.

| Sequential ( <i>i, i-1</i> ) | Intensity |
|------------------------------|-----------|
| HN1 – HA0                    | S         |
| HN2 – HA1                    | S         |
| HN3 – HA2                    | S         |
| HN4 – HA3                    | S         |
| HN5 – HA4                    | S         |
| HN6 – HA5                    | S         |
| HN7 – HA6                    | S         |
| HN8 – HA7                    | S         |
| HN9 – HA8                    | S         |
| HN10 – HA9                   | M         |
| HN11 – HA10                  | M         |
| HN12 – HA11                  | S         |
| HN13 – HA12                  | S         |
| HN14 – HA13                  | S         |
| HN15 – HA14                  | S         |
| HN16 – HA15                  | S         |
| HN17 – HA16                  | S         |
| HN18 – HA17                  | S         |
| HN19 – HA18                  | S         |
| HN20 – HA19                  | S         |
| HN <sub>2</sub> – HA20       | S         |
| HN <sub>2</sub> – HA20       | W         |

|                |   |
|----------------|---|
| HN5 – HB3      | M |
| HN15 – HB19    | M |
| HN12 – HA10    | W |
| HN3 – HA1      | W |
| HN13 – HA11    | W |
| NH2(2) – HA19  | W |
| HAr19 – HB17   | W |
| HD5 – HB3      | W |
| HN14 – HB12    | W |
| HN17 – HB15    | M |
| NH2(2) – HB 19 | M |
| HB4 – HB2      | S |
| HB14 – HB12    | S |
| HB18 – CH2 16  | M |
| Ar(1)5 – HA3   |   |

| Medium range ( <i>i, i+2</i> ) | Intensity |
|--------------------------------|-----------|
| HN18 – HA20                    | W?        |
| HN4 – HA6                      | W?        |
| HB3 – HB5                      | S         |
| HB17 – HB19 (1)                | S         |
| HB17 – HB19 (2)                | S         |

| NH-HN         | Intensity |
|---------------|-----------|
| HN1 – HN2     | W         |
| HN2 – HN3     | M         |
| HN4 – HN5     | M         |
| HN6 – HN7     | M         |
| HN7 – HN8     | W         |
| HN8 – HN9     | M         |
| HN10 – HN11   | M         |
| HN11 – HN12   | M         |
| HN12 – HN13   | M         |
| HN13 – HN14   | W         |
| HN14 – HN15   | M         |
| HN18 – HN19   | M         |
| HN19 – HN20   | M         |
| HN20 – HN2(1) | M         |

| NH   | 3J [Hz] |
|------|---------|
| HN1  | 8.39    |
| HN2  | 7.32*   |
| HN3  | 8.62    |
| HN4  | 9.50    |
| HN5  | 5.28    |
| HN6  | 8.48    |
| HN7  | 8.34    |
| HN8  | 5.09    |
| HN9  | 6.12*   |
| HN10 | 5.63    |
| HN11 | 5.64    |
| HN12 | 6.97    |
| HN13 | 8.57    |
| HN14 | 9.16    |
| HN15 | 5.28*   |
| HN16 | 8.18    |
| HN17 | 8.07    |
| HN18 | 9.61    |
| HN19 | 6.37    |
| HN20 | 7.54*   |

| Medium range ( <i>i, i-2</i> ) | Intensity |
|--------------------------------|-----------|
| HN9 – HB7                      | M         |
| NH19 – HB17                    | M         |

**Table S6.** NMR chemical shifts assignments for peptide **12**.

| Residue | Proton | Chemical | shift |
|---------|--------|----------|-------|
|         |        |          |       |

|      |                 | [ppm]                                         |
|------|-----------------|-----------------------------------------------|
| Ac0  | HA              | 1.998                                         |
| Lys1 | HN              | 8.338                                         |
|      | HA              | 4.234                                         |
| Lys1 | CH <sub>2</sub> | 1.835;<br>1.724;<br>1.516;<br>1.426           |
|      |                 |                                               |
| ala2 | HN              | 8.526                                         |
|      | HA              | 4.316                                         |
|      | CH <sub>3</sub> | 1.388                                         |
| CpS3 | HN              | 7.752                                         |
|      | HB              | 2.992                                         |
|      | HA              | 4.4724                                        |
| CpR4 | CH <sub>2</sub> | -                                             |
|      |                 |                                               |
|      |                 |                                               |
|      |                 |                                               |
| Tyr5 | HN              | 7.890                                         |
|      | HB              | 2.862                                         |
|      | HA              | 4.387                                         |
|      | CH <sub>2</sub> | -                                             |
| Tyr5 | HN              | 8.516                                         |
|      | HA              | 4.378                                         |
|      | CH <sub>2</sub> | 2.993<br>3.084                                |
|      | CH arom         | 7.134 (1);<br>6.772 (2)                       |
| lys6 | HN              | 8.372                                         |
|      | HA              | 4.230                                         |
|      | CH <sub>2</sub> | 1.755;<br>1.471;<br>0.892                     |
| CpS7 | HN              | 7.650                                         |
|      | HB              | 2.969                                         |
|      | HA              | 4.676                                         |
|      | CH <sub>2</sub> | -                                             |
| CpR8 | HN              | 8.618                                         |
|      | HB              | 2.616                                         |
|      | HA              | 4.349                                         |
|      | CH <sub>2</sub> | 1.998;<br>1.888;<br>1.737;<br>1.605;<br>1.505 |
| CpS9 | HN              | 7.984                                         |
|      | HB              | 3.074                                         |

|                 |                 |                                     |
|-----------------|-----------------|-------------------------------------|
|                 | HA              | 4.590                               |
|                 | CH <sub>2</sub> | -                                   |
| CpS10           | HN              | 8.309                               |
|                 | HB              | 2.788                               |
|                 | HA              | 4.374                               |
|                 | CH <sub>2</sub> | 1.379<br>1.746<br>1.629             |
| CpR11           | HN              | 7.932                               |
|                 | HB              | 2.788                               |
|                 | HA              | 4.479                               |
|                 | CH <sub>2</sub> | -                                   |
| CpS12           | HN              | 8.119                               |
|                 | HB              | 2.905                               |
|                 | HA              | 4.581                               |
|                 | CH <sub>2</sub> | -                                   |
| lys13           | HN              | 8.955                               |
|                 | HA              | 4.286                               |
|                 | CH <sub>2</sub> | 1.884;<br>1.837;<br>1.672;<br>1.544 |
| Ala14           | HN              | 8.657                               |
|                 | HA              | 4.420                               |
|                 | CH <sub>3</sub> | 1.409                               |
| CpR15           | HN              | 7.605                               |
|                 | HB              | 2.915                               |
|                 | HA              | 4.567                               |
|                 | CH <sub>2</sub> | -                                   |
| CpS16           | HN              | 8.225                               |
|                 | HB              | 2.804                               |
|                 | HA              | 4.424                               |
|                 | CH <sub>2</sub> | -                                   |
| ala17           | HN              | 8.699                               |
|                 | HA              | 4.379                               |
|                 | CH <sub>3</sub> | 1.465                               |
| Glu18           | HN              | 8.682                               |
|                 | HA              | 4.409                               |
|                 | CH <sub>2</sub> | 2.284<br>1.952                      |
|                 | COOH            | 2.438                               |
| NH <sub>2</sub> | HN1             | 7.662                               |
|                 | HN2             | 7.328                               |

**Table S7.** NOESY contacts for peptide **12**.

| Sequential ( <i>i</i> ,<br><i>i</i> -1) | Intensity |
|-----------------------------------------|-----------|
|-----------------------------------------|-----------|

|           |   |
|-----------|---|
| HN1 – HA0 | S |
| HN2 – HA1 | S |

|              |                  |
|--------------|------------------|
| HN3 – HA2    | S                |
| HN4 – HB3    | S                |
| HN5 – HB4    | S                |
| HN6 – HA5    | S                |
| HN7 – HA6    | S                |
| HN8 – HB7    | S                |
| HN9 – HB8    | S                |
| HN10 – HA9   | S                |
| HN11 – HA10  | S                |
| HN12 – HA11  | S                |
| HN13 – HA12  | S                |
| HN14 – HB13  | S                |
| HN15 – HB14  | S                |
| HN16 – HA15  | S                |
| HN17 – HA16  | S                |
| HN18 – HB17  | S                |
| HN – HA20    | S (1)<br>W (2)   |
|              |                  |
| <b>NH-HN</b> | <b>Intensity</b> |
| HN1 – HN2    | W                |
| HN2 – HN3    | M                |
| HN4 – HN5    | M                |
| HN6 – HN7    | M                |
| HN8 – HN9    | W                |
| HN10 – HN11  | W                |
| HN12 – HN13  | W                |
| HN14 – HN15  | M                |
| HN16 – HN17  | W                |

|                        |       |
|------------------------|-------|
| HN <sub>2</sub> – HN20 | M (1) |
|------------------------|-------|

| <b>Medium range (i, i-2)</b>  | <b>Intensity</b> |
|-------------------------------|------------------|
| NH3 - HA1                     | W                |
| NH5 - HA3                     | M                |
| NH9 - HA7                     | M                |
| NH13 - HA11                   | M                |
| NH15 - HA13                   | W                |
| NH17 - HA15                   | M                |
| CH <sub>arom</sub> 5(1) - HA3 | W                |

| <b><sup>3</sup>J<sub>HN-HA</sub> [Hz]</b> |       |
|-------------------------------------------|-------|
| HN1                                       | 6.263 |
| HN3                                       | 8.436 |
| HN6                                       | 8.778 |
| HN8                                       | 9.861 |
| HN9                                       | 7.702 |
| HN10                                      | 9.117 |
| HN11                                      | 7.426 |
| HN12                                      | 9.565 |
| HN13                                      | 6.036 |
| HN14                                      | 7.801 |
| HN15                                      | 8.610 |
| HN16                                      | 9.433 |

**Table S8.** NMR chemical shifts assignments for peptide **13**.

| <b>Residue</b> | <b>Proton</b> | <b>Chemical shift [ppm]</b> |
|----------------|---------------|-----------------------------|
|----------------|---------------|-----------------------------|

|      |    |       |
|------|----|-------|
| Ac1  | HA | 2.032 |
| Lys2 | HN | 8.206 |
|      | HA | 4.312 |

|       |                 |                                               |
|-------|-----------------|-----------------------------------------------|
|       | CH <sub>2</sub> | 1.838;<br>1.695;<br>1.516;<br>1.438           |
| CpS3  | HN              | 7.932                                         |
|       | HB              | 2.950                                         |
|       | HA              | 4.502                                         |
|       | CH <sub>2</sub> | 2.005;<br>1.938;<br>1.858<br>1.634            |
| CpR4  | HN              | 8.026                                         |
|       | HB              | 2.785                                         |
|       | HA              | 4.397                                         |
|       | CH <sub>2</sub> | 2.064;<br>1.863;<br>1.750;<br>1.609;<br>1.506 |
| Ala5  | HN              | 8.437                                         |
|       | HA              | 4.344                                         |
|       | HB              | 1.424                                         |
| lys6  | HN              | 8.502                                         |
|       | HA              | 4.385                                         |
|       | CH <sub>2</sub> | 2.011;<br>1.763;<br>1.702;<br>1.530;<br>1.466 |
|       | HN              | 7.784                                         |
| CpS7  | HB              | 2.870                                         |
|       | HA              | 4.563                                         |
|       | CH <sub>2</sub> | 1.993;<br>1.884;<br>1.775                     |
|       | HN              | 8.231                                         |
| CpR8  | HB              | 2.858                                         |
|       | HA              | 4.465                                         |
|       | CH <sub>2</sub> | 2.097;<br>1.893;<br>1.625;<br>1.547           |
|       | HN              | 8.509                                         |
| Ser9  | HA              | 4.503                                         |
|       | HB              | 3.921;<br>3.881                               |
|       | HN              | 8.542                                         |
| ala10 | HA              | 4.322                                         |
|       | HB              | 1.398                                         |
|       | HN              | 7.551                                         |
| CpS11 | HB              | 2.842                                         |
|       | HA              | 4.377                                         |
|       | CH <sub>2</sub> | 2.014;<br>1.923;<br>1.810;<br>1.559           |
|       | HN              | 7.822                                         |
| CpS12 | HB              | 2.947                                         |
|       | HA              | 4.401                                         |
|       | CH <sub>2</sub> | 1.924;<br>1.855;                              |

**Table S9.** NOESY contacts for peptide 13.

| Sequential ( <i>i</i> ,<br><i>i</i> -1) | Intensity |
|-----------------------------------------|-----------|
| HN2 – HA1                               | S         |

|                 |                 |                                               |
|-----------------|-----------------|-----------------------------------------------|
|                 |                 | 1.702                                         |
| CpS13           | HN              | 7.622                                         |
|                 | HB              | 2.868                                         |
|                 | HA              | 4.472                                         |
| ala14           | CH <sub>2</sub> | 2.037;<br>1.938;<br>1.884;<br>1.646           |
|                 | HN              | 8.312                                         |
|                 | HA              | 4.336                                         |
| Ser15           | CH <sub>3</sub> | 1.364                                         |
|                 | HN              | 8.253                                         |
|                 | HA              | 4.339                                         |
| CpR16           | HB              | 3.932;<br>3.847                               |
|                 | HN              | 7.717                                         |
|                 | HB              | 2.948                                         |
|                 | HA              | 4.468                                         |
| CpS17           | CH <sub>2</sub> | 1.992;<br>1.870;<br>1.639                     |
|                 | HN              | 8.163                                         |
|                 | HB              | 2.816                                         |
|                 | HA              | 4.414                                         |
| lys18           | CH <sub>2</sub> | 1.850;<br>1.796;<br>1.721;<br>7.591;<br>1.506 |
|                 | HN              | 8.063                                         |
|                 | HA              | 4.013                                         |
|                 | CH <sub>2</sub> | 1.558;<br>1.494                               |
| Tyr19           | HN              | 8.425                                         |
|                 | HA              | 4.712                                         |
|                 | HB              | 3.325;<br>2.736                               |
|                 | Harom           | 6.744;<br>7.120                               |
| CpR20           | HN              | 7.738                                         |
|                 | HB              | 2.895                                         |
|                 | HA              | 4.524                                         |
|                 | CH <sub>2</sub> | 2.025;<br>1.786;<br>1.625                     |
| CpR21           | HN              | 8.328                                         |
|                 | HB              | 2.849                                         |
|                 | HA              | 4.482                                         |
|                 | CH <sub>2</sub> | 2.085;<br>1.890;<br>1.799;<br>1.632;<br>1.557 |
| glu22           | HN              | 8.568                                         |
|                 | HA              | 4.445                                         |
|                 | CH <sub>2</sub> | 2.245;<br>2.034                               |
|                 | COOH            | 2.514                                         |
| NH <sub>2</sub> | HN1             | 7.925                                         |
|                 | HN2             | 7.205                                         |

|           |   |
|-----------|---|
| HN3 – HA2 | S |
| HN4 – HB3 | S |



|             |   |
|-------------|---|
| HN5 – HB4   | S |
| HN6 – HA5   | S |
| HN7 – HA6   | S |
| HN8 – HB7   | S |
| HN9 – HB8   | S |
| HN10 – HA9  | S |
| HN11 – HA10 | S |
| HN12 – HB11 | S |
| HN13 – HB12 | S |
| HN14 – HB13 | S |
| HN15 – HA14 | S |
| HN16 – HA15 | S |
| HN17 – HB16 | S |
| HN18 – HB17 | S |
| HN19 – HA18 | S |
| HN20 – HA19 | S |
| HN21 – HB20 | S |
| HN22 – HB21 | S |
| HN1 – HA22  | S |
| HN2 - HA22  | W |

| NH-HN       | Intensity |
|-------------|-----------|
| HN3 – HN2   | W         |
| HN5 – HN4   | M         |
| HN7 – HN6   | M         |
| HN9 – HN8   | W         |
| HN11 – HN10 | M         |
| HN14 - HN13 | W         |
| HN16 – HN15 | M         |
| HN18 – HN17 | M         |
| HN20 – HN19 | M         |
| HN21 – HN20 | W         |
| HN22 – HN1  | W         |
| HN16 – HN14 | W         |

| Medium range (i, i-2)   | Intensity |
|-------------------------|-----------|
| NH4 – HA2               | W         |
| CH <sub>2</sub> 4 - HA2 | M         |
| NH5 - HA3               | M         |
| HB5 - HB3               | M         |
| NH7 – HA5               | M         |
| HB9 - HB7               | M         |

|                           |   |
|---------------------------|---|
| NH11 – HA9                | M |
| CH <sub>2</sub> 11 - HB9  | W |
| NH12 – HB10               | W |
| NH16 - HB14               | W |
| HB16 - HB14               | W |
| NH17 – HA15               | W |
| HB17 - HB15               | M |
| NH18 – HB16               | M |
| NH19 – HA17               | W |
| NH20 – HA18               | M |
| CH <sub>2</sub> 21 - HA19 | M |
| HA21 - HB19               | M |
| NH22 – HB20               | M |

| Medium range (i, i-3)     | Intensity |
|---------------------------|-----------|
| HA12 – HB9                | W         |
| HB15 – HA12               | W         |
| HB15 - CH <sub>2</sub> 12 | W         |
| HN18 – HB15               | W         |
| HA19 – HB16               | W         |

| Long range (i, i-4) | Intensity |
|---------------------|-----------|
| HB9 – HA5           | W         |
| HN18 – HA14         | W         |
| HN22 – HA18         | W         |

| <sup>3</sup> J <sub>HN-HA</sub> [Hz] |        |
|--------------------------------------|--------|
| HN2                                  | 7.387  |
| HN4                                  | 8.829  |
| HN7                                  | 8.108* |
| HN8                                  | 8.889  |
| HN10                                 | 6.847  |
| HN11                                 | 7.988  |
| HN12                                 | 8.228* |
| HN13                                 | 8.288  |
| HN15                                 | 7.868  |
| HN17                                 | 9.489  |
| HN18                                 | 5.165  |
| HN22                                 | 7.567  |

**Table S10.** NMR chemical shifts assignments for peptide **14**.

| Residue | Proton | Chemical shift [ppm] |
|---------|--------|----------------------|
| Ac1     | HA     | 1.846                |
|         | HN     | 8.041                |
| ala2    | HA     | 4.043                |

|       |                 |                                     |
|-------|-----------------|-------------------------------------|
|       | HB              | 1.161                               |
| CpS3  | HN              | 7.706                               |
|       | HB              | 4.187                               |
|       | HA              | 2.663                               |
|       | CH <sub>2</sub> | 1.447;<br>1.653;<br>1.824           |
| CpR4  | HN              | 7.384                               |
|       | HB              | 4.086                               |
|       | HA              | 2.668                               |
|       | CH <sub>2</sub> | 1.288;<br>1.441;<br>1.650;<br>1.769 |
| Tyr5  | HN              | 8.020                               |
|       | HA              | 4.282                               |
|       | HB              | 2.798;<br>2.846                     |
|       | HD              | 6.968;<br>6.687                     |
|       | HE              | 7.476                               |
| ala6  | HN              | 8.007                               |
|       | HA              | 3.954                               |
|       | HB              | 0.949                               |
| CpS7  | HN              | 7.341                               |
|       | HB              | 4.236                               |
|       | HA              | 2.657                               |
|       | CH <sub>2</sub> | 1.428;<br>1.663;<br>1.772           |
| CpR8  | HN              | 7.666                               |
|       | HB              | 4.107                               |
|       | HA              | 2.721                               |
|       | CH <sub>2</sub> | 1.369;<br>1.457;<br>1.639;<br>1.731 |
| Ser9  | HN              | 8.044                               |
|       | HA              | 4.347                               |
|       | HB              | 3.696                               |
| ala10 | HN              | 8.172                               |
|       | HA              | 4.124                               |
|       | HB              | 1.163                               |
| CpR11 | HN              | 7.695                               |
|       | HB              | 4.183                               |
|       | HA              | 2.779                               |
|       | CH <sub>2</sub> | 1.713                               |
| CpR12 | HN              | 7.492                               |
|       | HB              | 4.119                               |
|       | HA              | 2.583                               |

|                 |                 |                                               |
|-----------------|-----------------|-----------------------------------------------|
|                 | CH <sub>2</sub> | 1.400;<br>1.611;<br>1.750                     |
| CpS13           | HN              | 7.447                                         |
|                 | HB              | 4.072                                         |
|                 | HA              | 2.562                                         |
| CpR14           | CH <sub>2</sub> | 1.402;<br>1.475;<br>1.646;<br>1.778           |
|                 | HN              | 7.621                                         |
|                 | HB              | 4.110                                         |
|                 | HA              | 2.728                                         |
| Lys15           | CH <sub>2</sub> | -                                             |
|                 | HN              | 8.109                                         |
|                 | HA              | 4.031                                         |
|                 | HB              | 1.266                                         |
|                 | HD              | 0.8889;<br>0.9723                             |
|                 | HG              | 1.366                                         |
| tyr16           | HE              | 2.693                                         |
|                 | HN              | 8.191                                         |
|                 | HA              | 4.454                                         |
|                 | HB              | 2.642;<br>3.018                               |
|                 | HD              | 6.983;<br>6.666                               |
|                 | HE              | -                                             |
|                 | CpS17           | HN                                            |
| HB              |                 | 4.234                                         |
| HA              |                 | 2.662                                         |
| CH <sub>2</sub> |                 | 1.342;<br>1.443;<br>1.633;<br>1.753           |
| CpR18           | HN              | 7.558                                         |
|                 | HB              | 4.168                                         |
|                 | HA              | 2.753                                         |
|                 | CH <sub>2</sub> | 1.369;<br>1.456;<br>1.650;<br>1.720;<br>1.781 |
| Ser19           | HN              | 8.161                                         |
|                 | HA              | 4.324                                         |
|                 | HB              | 3.718                                         |
| ala20           | HN              | 8.402                                         |
|                 | HA              | 4.139                                         |
|                 | HB              | 1.257                                         |
| NH <sub>2</sub> | HN1             | -                                             |
|                 | HN2             | -                                             |

**Table S11.** NOESY contacts for peptide 14.

| Sequential ( <i>i, i-1</i> ) | Intensity |
|------------------------------|-----------|
| 2HN – 1HA                    | M         |
| 3HN – 2HA                    | S         |

|           |   |
|-----------|---|
| 4HN – 3HB | S |
| 4HN – 3HA | S |
| 5HN – 4HB | M |

|             |   |
|-------------|---|
| 5HN – 4HA   | M |
| 5HA – 4HN   | M |
| 5HB – 4HN   | M |
| 6HN – 5HA   | S |
| 6HA – 5HB   | S |
| 6HA – 5HD   | S |
| 6HB – 5HD   | S |
| 6HB – 5HE   | S |
| 6HA – 5HE   | S |
| 7HN – 6HA   | S |
| 7HN – 6HB   | S |
| 7HA – 6HB   | S |
| 8HN – 7HB   | M |
| 8HN – 7HA   | S |
| 8HB – 7HN   | S |
| 9HN – 8HB   | M |
| 9HN – 8HA   | S |
| 10HN – 9HA  | S |
| 10HN – 9HB  | S |
| 10HB – 9HN  | W |
| 11HN – 10HA | S |
| 11HN – 10HB | S |
| 12HN – 11HA | S |
| 12HN – 11HB | M |
| 12HG – 11HA | S |
| 13HN – 12HA | S |
| 13HN – 12HB | S |
| 14HN – 13HA | S |
| 14HA – 13HN | S |
| 15HN – 14HB | S |
| 15HN – 14HB | W |
| 15HA – 14HN | W |
| 16HN – 15HA | S |
| 16HB – 15HB | S |
| 16HN – 15HB | W |
| 16HD – 15HB | W |
| 16HD – 15HG | W |
| 16HE – 15HG | W |
| 16HE – 15HE | W |
| 16HD – 15HE | W |
| 17HN – 16HA | S |
| 17HN – 16HB | M |
| 17HG – 16HN | S |
| 17HN – 16HE | M |
| 17HG – 16HE | M |
| 18HN – 17HA | S |
| 18HN – 17HB | W |
| 19HN – 18HA | S |
| 19HN – 18HB | W |
| 20HN – 19HA | W |
| 20HN – 19HB | W |

|             |   |
|-------------|---|
| 9HN – 10HN  | M |
| 10HN – 11HN | M |
| 13HN – 14HN | M |
| 14HN – 15HN | M |
| 15HN – 16HN | M |
| 16HN – 17HN | S |
| 18HN – 19HN | M |

| Middle range ( <i>i, i-2</i> ) | Intensity |
|--------------------------------|-----------|
| 5HN – 3HB                      | W         |
| 5HD – 3HB                      | W         |
| 7HN – 5HA                      | W         |
| 8HN – 6HB                      | W         |
| 8HA – 6B                       | W         |
| 9HN – 7HB                      | W         |
| 11HN – 9HB                     | W         |
| 12HN – 10HB                    | M         |
| 15HB – 13HA                    | W         |
| 15HD – 13HA                    | W         |
| 16HD – 14HB                    | S         |
| 16HD – 14HG                    | S         |
| 17HN – 15HA                    | W         |
| 17HN – 15HB                    | W         |
| 18HN – 16HA                    | W         |
| 19HN – 17HB                    | M         |

| Middle range ( <i>i, i-3</i> ) | Intensity |
|--------------------------------|-----------|
| 6HA – HN3                      | W         |
| 8HA – HD5                      | W         |
| 9HN – 6HB                      | W         |
| 14HA – 11HN                    | W         |
| 15HN – 12HA                    | W         |

| <sup>3</sup> J <sub>HN-HA</sub> [Hz] |      |
|--------------------------------------|------|
| HN4                                  | 8.17 |
| HN7                                  | 8.29 |
| HN8                                  | 8.17 |
| HN12                                 | 8.53 |
| HN13                                 | 7.81 |
| HN15                                 | 6.13 |
| HN18                                 | 8.35 |

| NH-HN     | Intensity |
|-----------|-----------|
| 2HN – 3HN | S         |
| 4HN – 5HN | S         |
| 6HN – 7HN | S         |
| 7HN – 8HN | S         |
| 8HN – 9HN | M         |

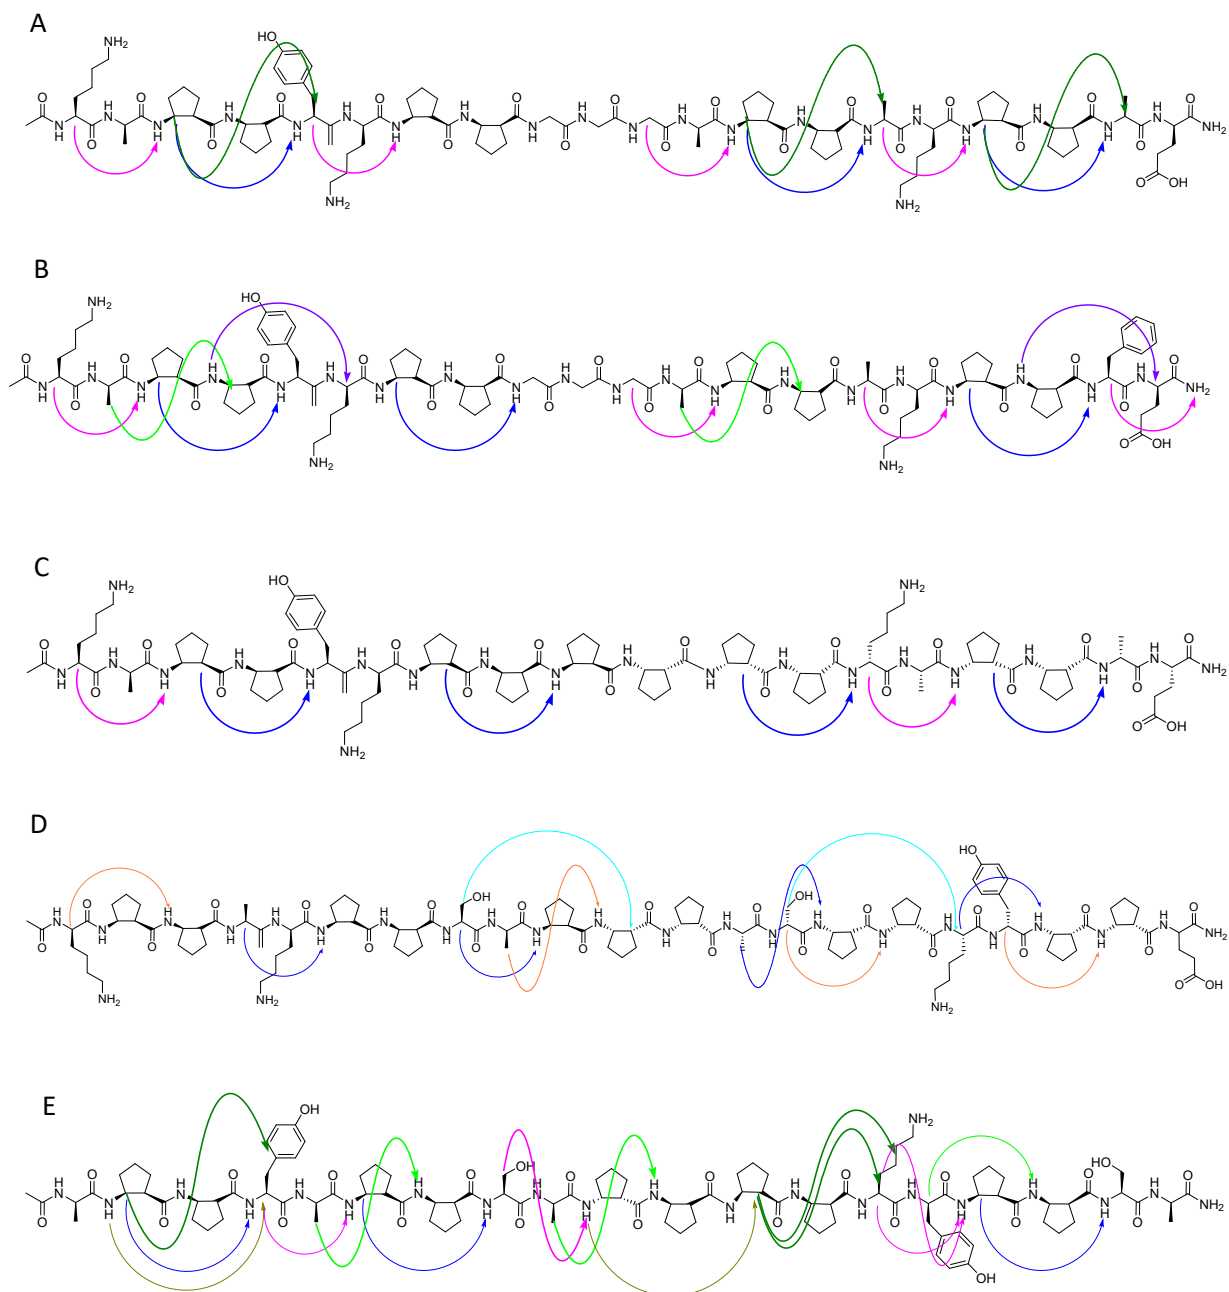

**Figure S8.** Structural formulas for peptides **8** (A), **9** (B), **12** (C), **13** (D) and **14** (E). The arrows indicate regular non-sequential contacts found in ROESY or NOESY spectra. The coloring of arrows is consistent and indicates contacts between particular atom types, e.g. (1*R*,2*S*)-ACPC-Ca(*i*) – (*S*)-aa-HN(*i*+2) is colored dark blue.

**Table S12.** NMR calculation statistics for the biggest clusters.

| Cluster                                           | 1        | 2        | 3        |
|---------------------------------------------------|----------|----------|----------|
| Total number of NOE restraints                    | 80       |          |          |
| (i, i+1)                                          | 60       |          |          |
| (i, i+2)                                          | 15       |          |          |
| (i, i+3)                                          | 5        |          |          |
| Number of members                                 | 25 (25%) | 16 (16%) | 13 (13%) |
| Average number of NOE violations per structure    | 12.1     | 10.5     | 9.6      |
| Average amount of NOE violation per structure [Å] | 3.3      | 3.2      | 2.5      |
| Average RMSD for C $\alpha$ [Å]                   | 0.256    | 0.256    | 0.229    |

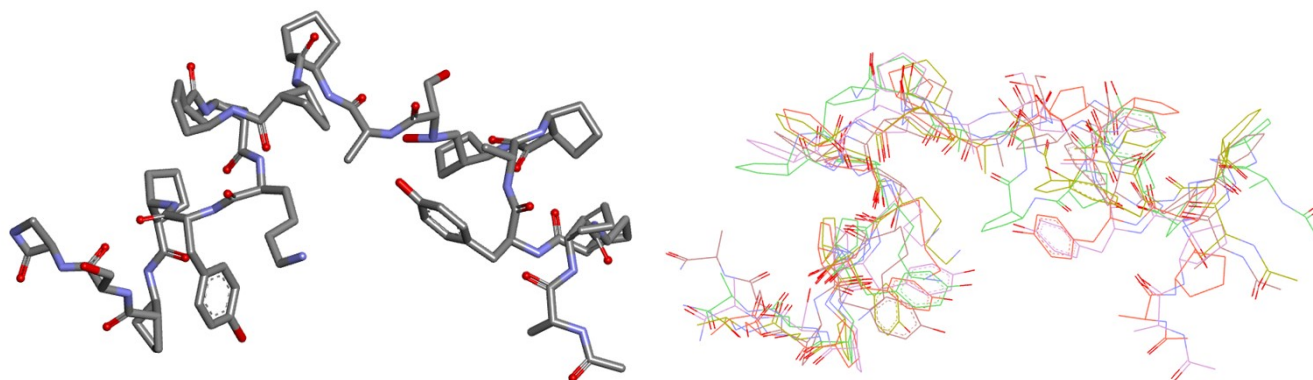

**Figure S9.** Average structure of cluster 1 (left) and superimposition of the 5 lowest energy structures of cluster 1 (right).

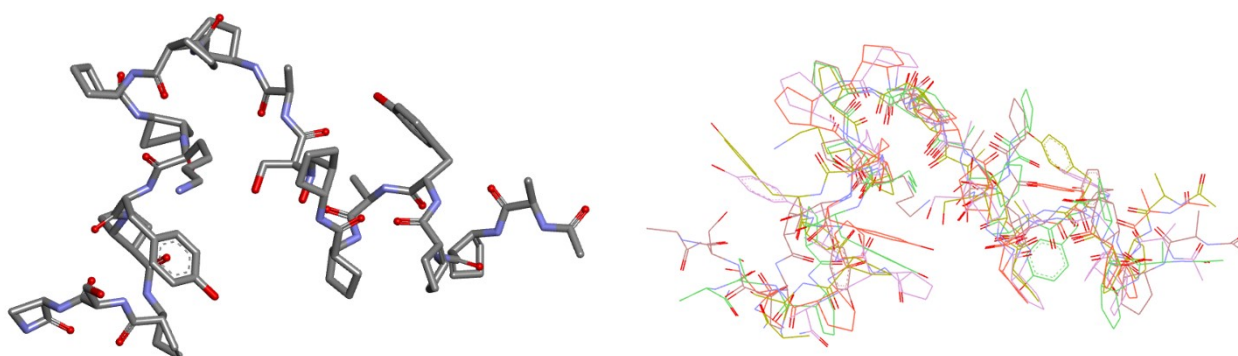

**Figure S10.** Average structure of cluster 2 (left) and superimposition of the 5 lowest energy structures of cluster 2 (right).

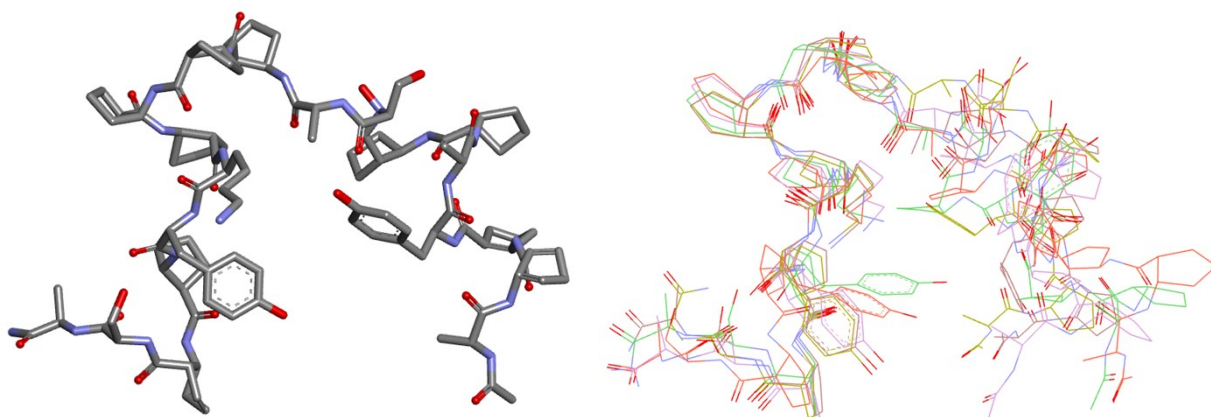

**Figure S11.** Average structure of cluster 3 (left) and superimposition of the 5 lowest energy structures of cluster 3 (right).

**Table S13.** Distances between active site residues calculated for 3 clusters (five top energy structures). RMSD are given as errors.

| Distance [Å]        | Cluster 1  | Cluster 2  | Cluster 3  | RA95.5-8F<br>(PDB id 5AN7) |
|---------------------|------------|------------|------------|----------------------------|
| Tyr16(CA)-Tyr5(CA)  | 14.6 ± 0.8 | 14.9 ± 1.0 | 12.2 ± 1.3 | 12.4                       |
| Tyr16(OH)-Tyr5(OH)  | 10.8 ± 3.1 | 14.5 ± 4.9 | 10.1 ± 1.4 | 2.7                        |
| Tyr16(CA)-Lys15(CA) | 3.8 ± 0.0  | 3.7 ± 0.0  | 3.8 ± 0.0  | 8.2                        |
| Tyr16(OH)-Lys15(NZ) | 7.1 ± 1.2  | 7.7 ± 0.8  | 7.6 ± 1.4  | 4.3                        |
| Tyr5(CA)-Lys15(CA)  | 11.9 ± 0.7 | 12.2 ± 0.9 | 10.2 ± 0.9 | 14.7                       |
| Tyr5(OH)-Lys15(NZ)  | 7.9 ± 3.8  | 14.4 ± 1.3 | 7.7 ± 2.6  | 3.2                        |

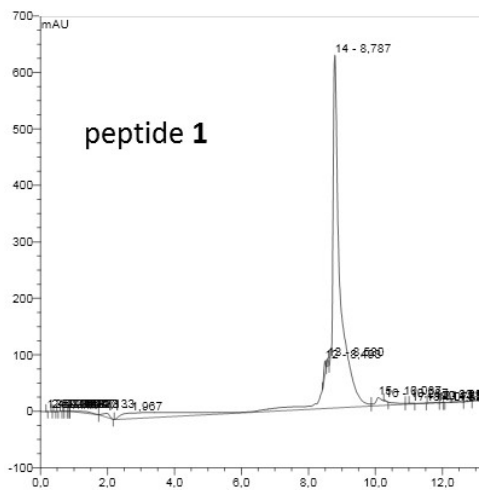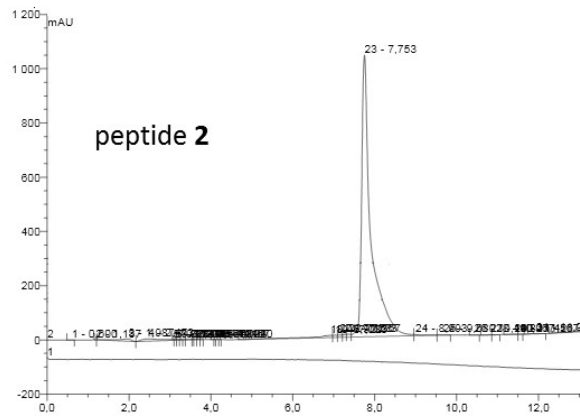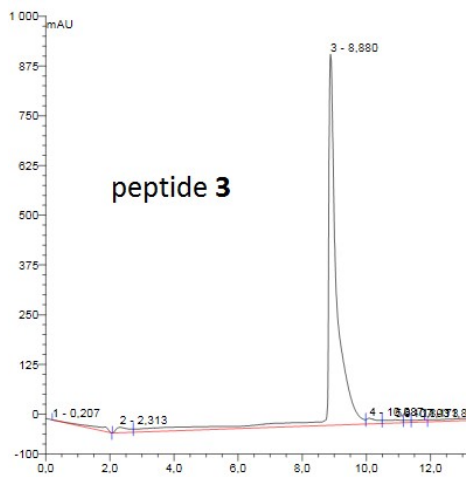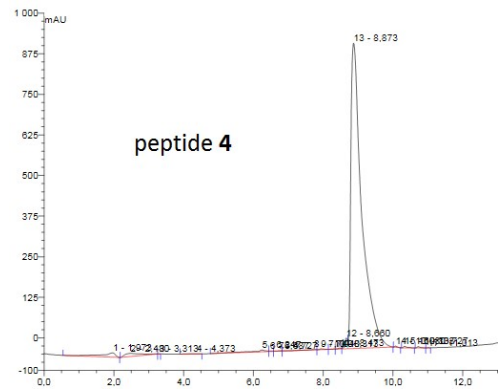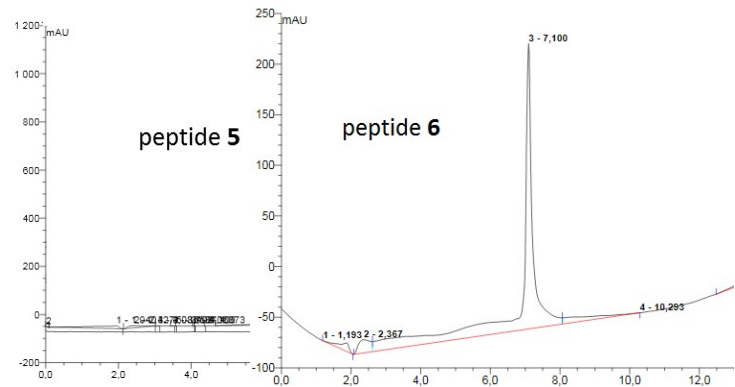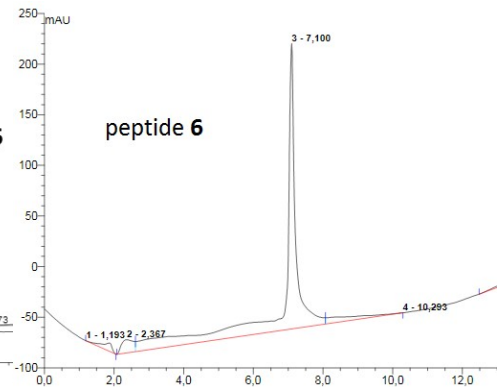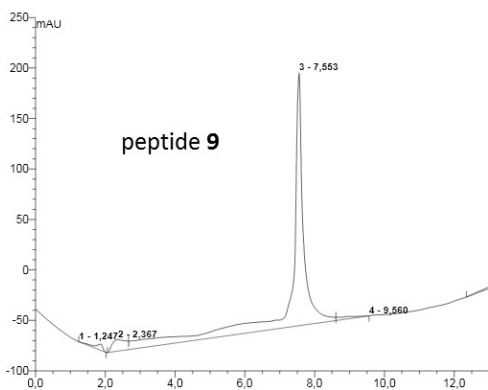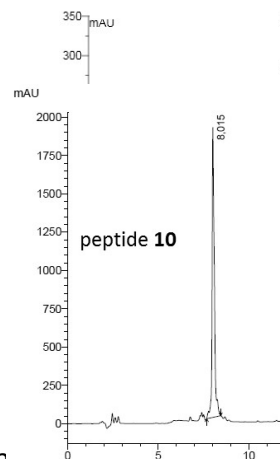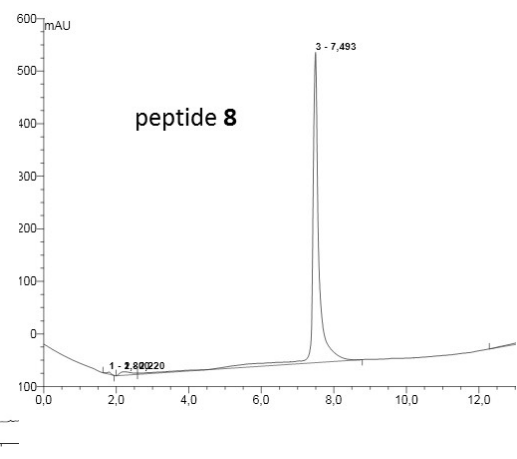





**Figure S12.** Analytical HPLC chromatograms for analyzed peptides.
